# Supplementary material for: Cl-assisted highly efficient synthesis of FePd3 alloys encapsulated in graphite papers: a two stage CVD approach
Source: Royal Society of Chemistry journal article supplement (doi:10.1039/c6ra04777g), 2016-01-01
Supplement: c6ra04777g1.pdf [file c6ra04777g1.pdf]

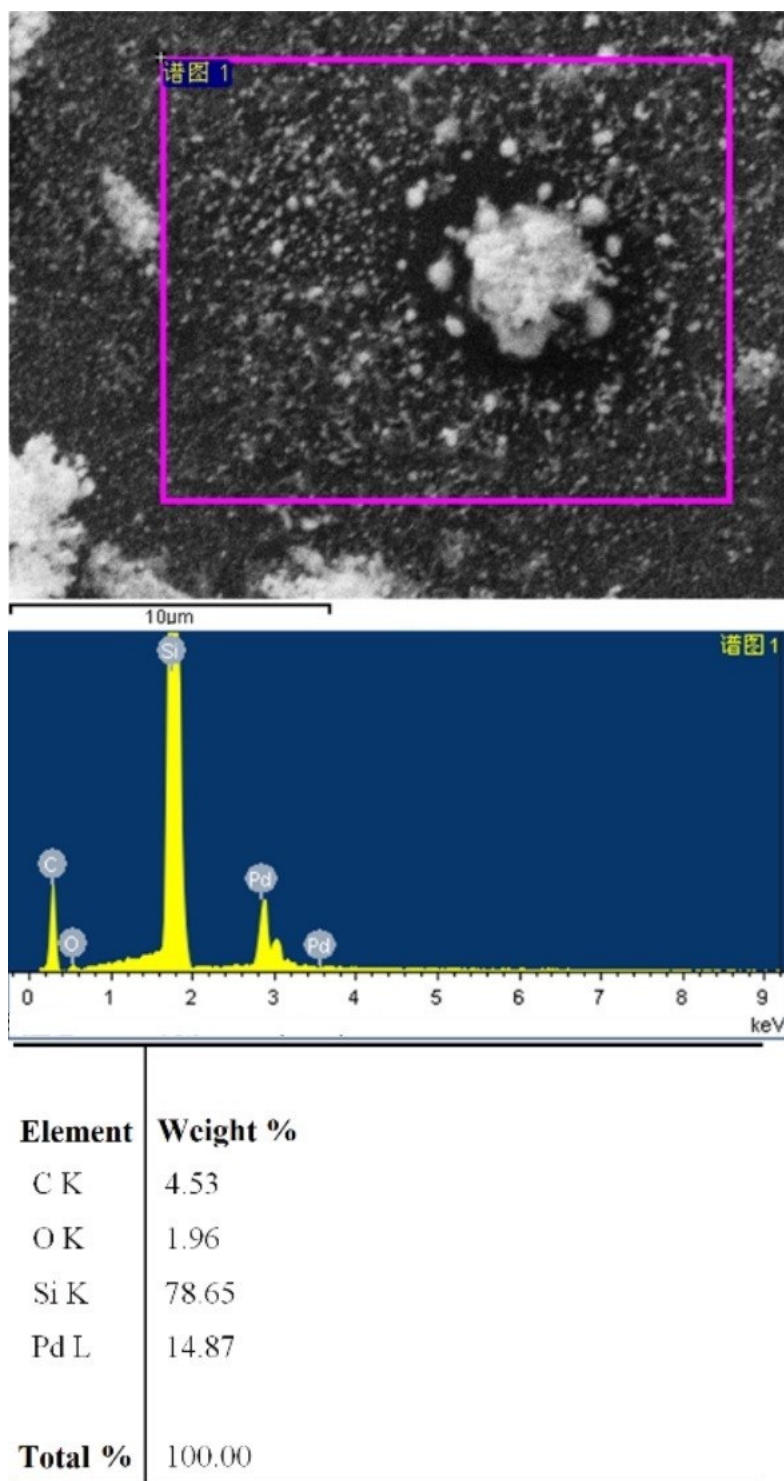

**Fig. Supp.1:** EDX analyses of the area shown in Fig.Supp.2A revealing the presence of residual Pd catalyst particles on the top of the substrate surface.

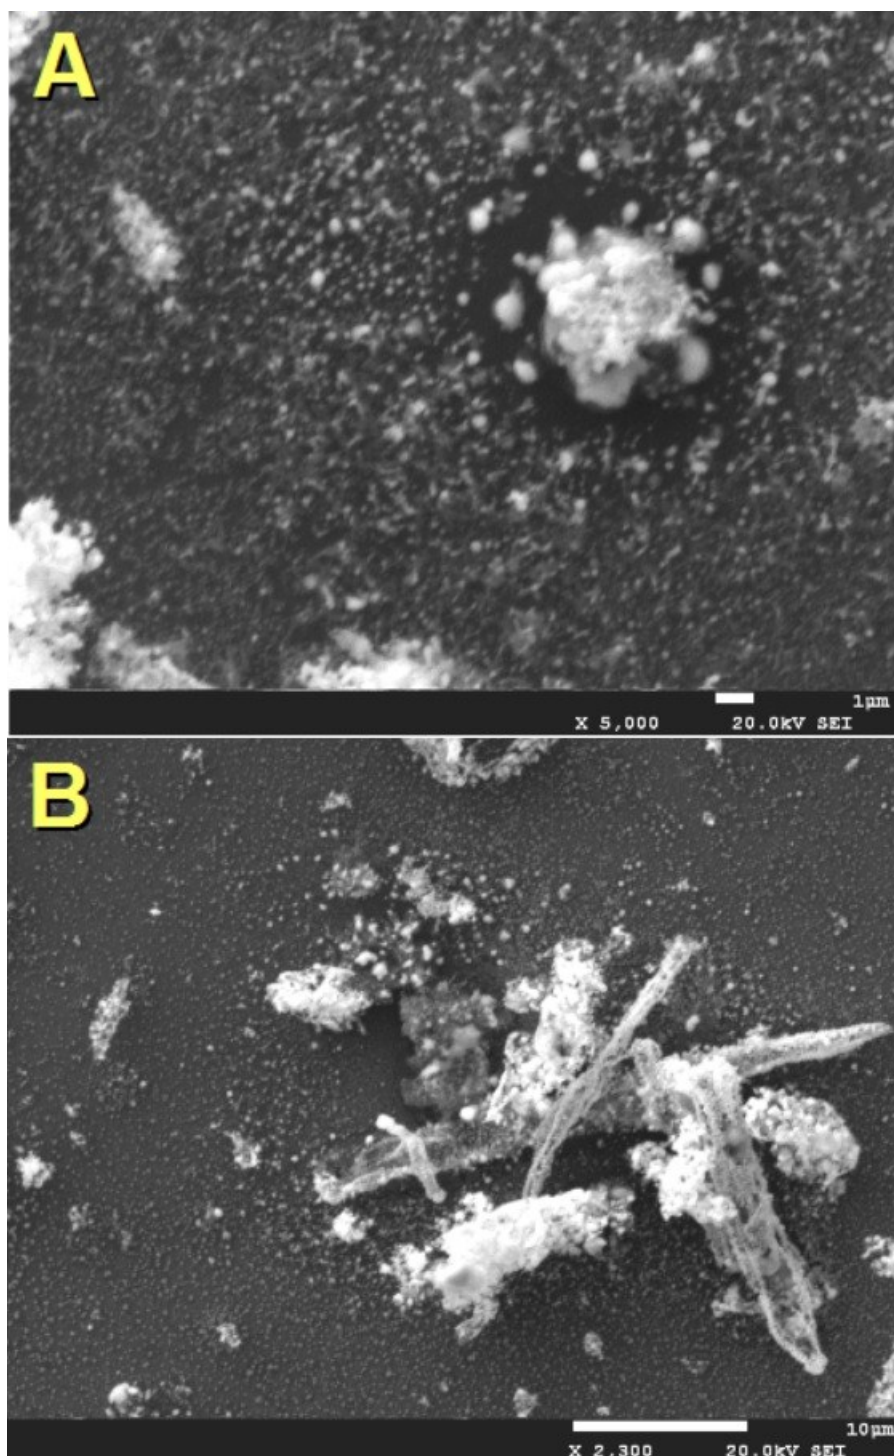

**Fig. Supp.2:** Scanning electron micrograph showing residual Pd particles deposited in the substrate surface during the stage 1 of the reaction in A. Some examples of the grown structures are also shown in B.

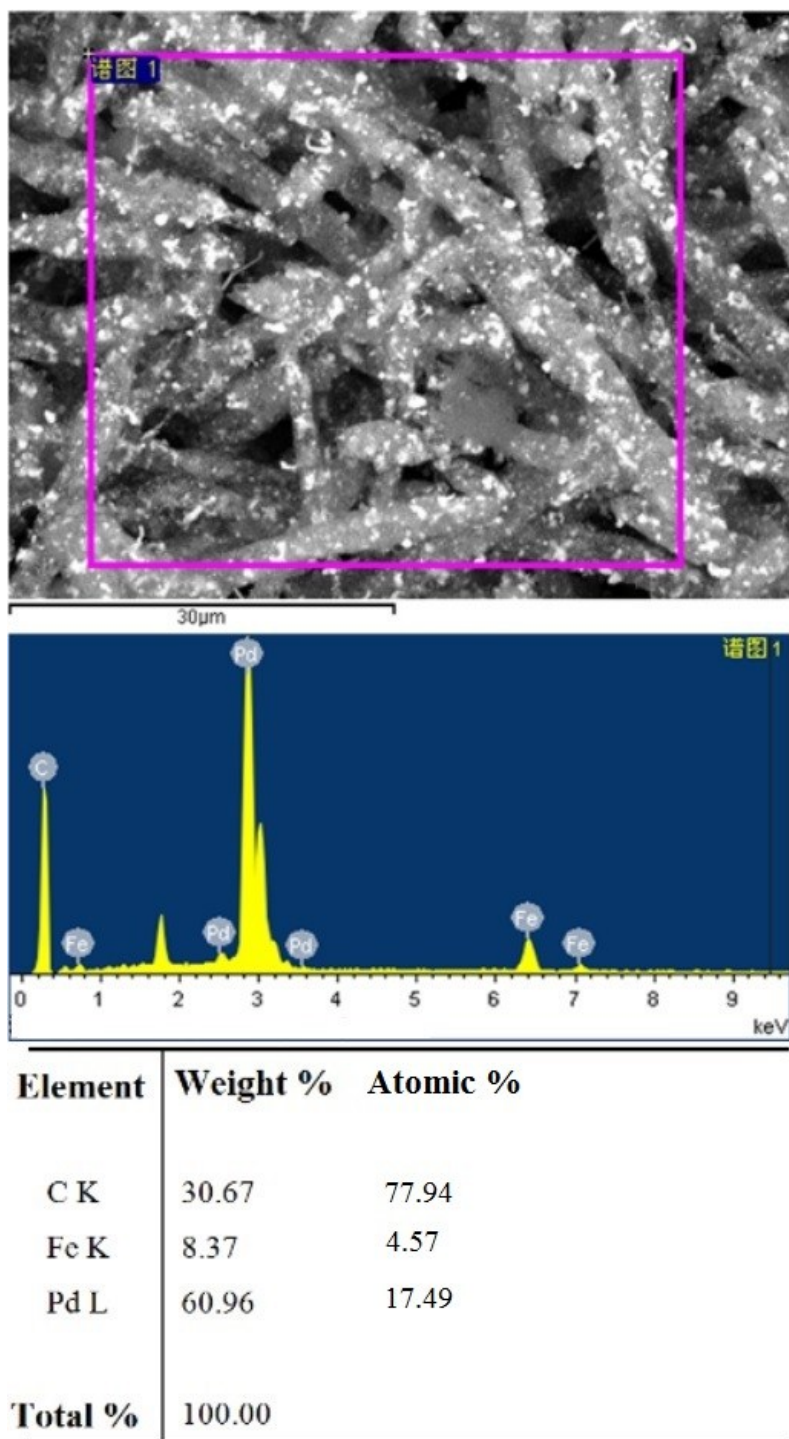

**Fig. Supp.3:** Scanning electron micrograph showing with backscattered electrons the area chosen for EDX analyses. The result of the EDX analyses show approximately a ratio of 1 (Fe): 3 (Pd) (see inset) with respective weight % of the elements. Note that due to the contribution of the elements in the neighbour particles within the graphitic structures, EDX can not be used to estimate accurately the atomic % composition of a single encapsulated particle. However it seems clear that a possible ratio of Fe (1): Pd (3) is present. This is confirmed by the Rietveld analyses of the XRD diffractograms.
